# Supplementary material for: Mutation Screening of Retinal Dystrophy Patients by Targeted Capture from Tagged Pooled DNAs and Next Generation Sequencing
Source: PubMed Central journal article supplement (PMC4136783; doi:10.1371/journal.pone.0104281), 2014-08-18
Supplement: pone.0104281.s001.pdf [file pone.0104281.s001.pdf]

Supplementary Figure S1. Chromatograms for each mutation.

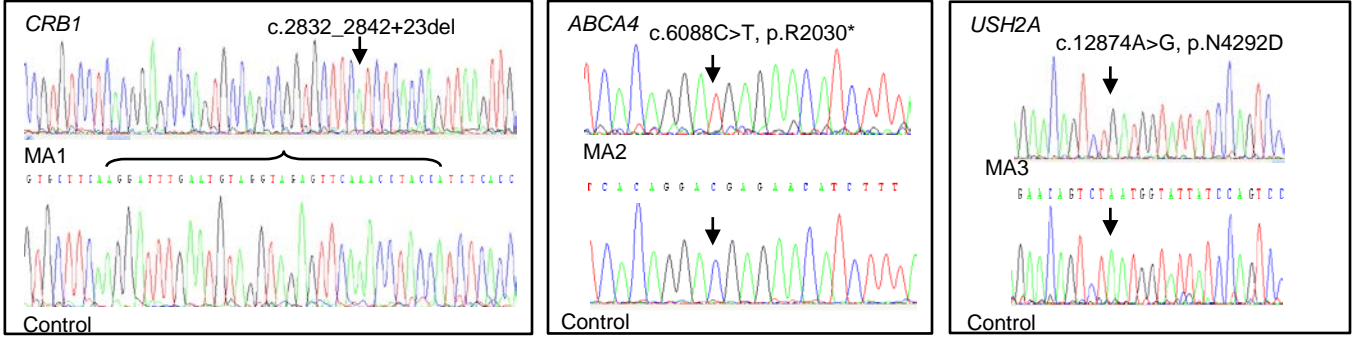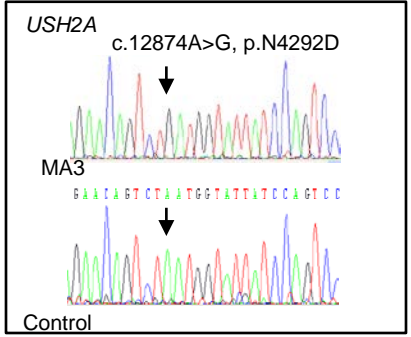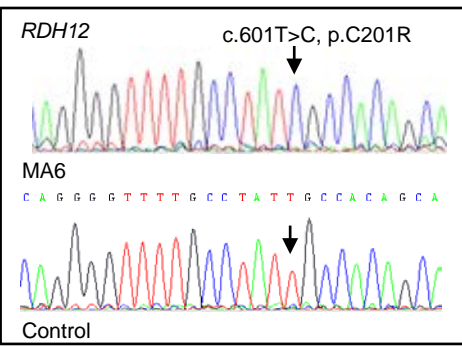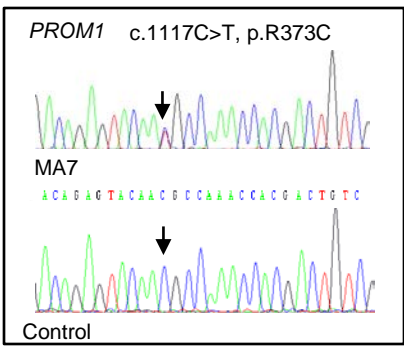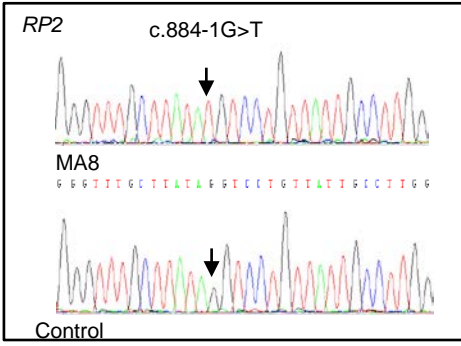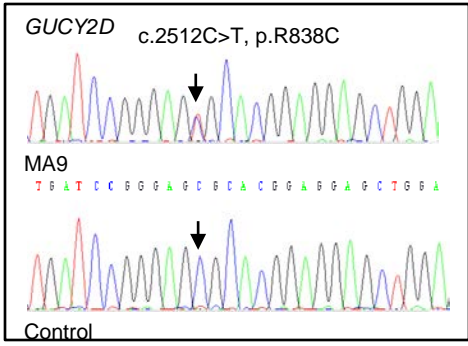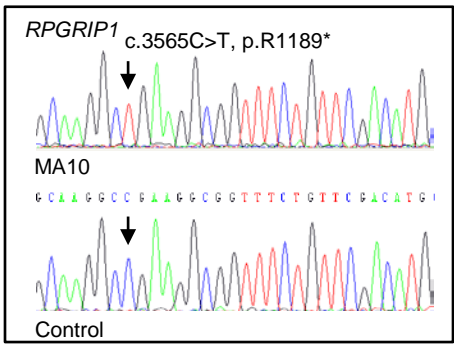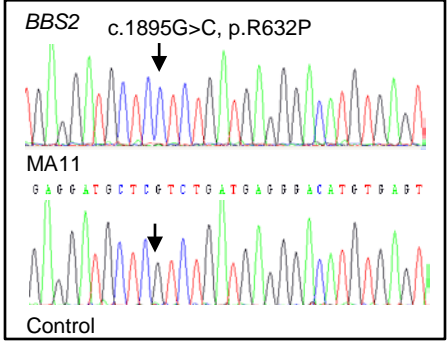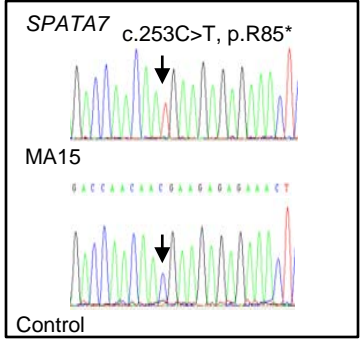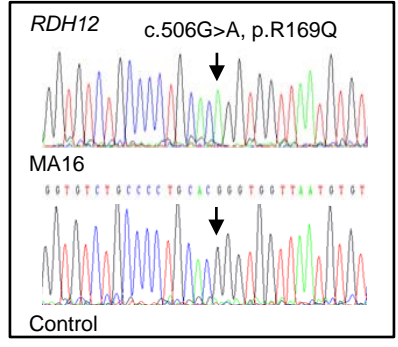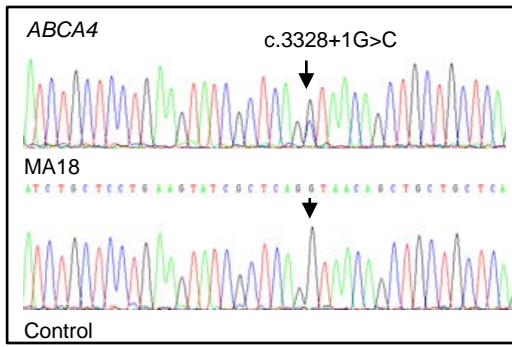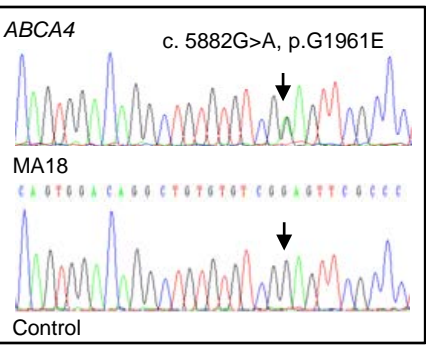

Supplementary Table S1 Summary of specific details of families that were studied.

| ID   | Diagnosis           | Inheritance Pattern | Ethnicity | Number of Affected Cases | Number of Affected Cases Sampled | Number of Unaffected Cases Sampled |
|------|---------------------|---------------------|-----------|--------------------------|----------------------------------|------------------------------------|
| MA1  | LCA                 | Rec.                | Asian     | 4                        | 2                                | 0                                  |
| MA2  | CRD                 | Rec./Dom.           | Asian     | 5                        | 3                                | 0                                  |
| MA3  | RP                  | Rec.                | Asian     | 3                        | 2                                | 0                                  |
| MA4  | RP                  | Rec.                | Asian     | 2                        | 2                                | 0                                  |
| MA5  | CRD                 | Dom.                | European  | 2                        | 2                                | 0                                  |
| MA6  | RP                  | Rec.                | Asian     | 2                        | 1                                | 0                                  |
| MA7  | CRD                 | Dom.                | European  | 12                       | 8                                | 4                                  |
| MA8  | RP with maculopathy | Dom./X-link.        | European  | 10                       | 9                                | 5                                  |
| MA9  | MD                  | Dom.                | European  | 18                       | 12                               | 2                                  |
| MA10 | CRD                 | Rec.                | Asian     | 6                        | 6                                | 1                                  |
| MA11 | RP                  | Rec.                | European  | 2                        | 2                                | 0                                  |
| MA12 | CRD                 | Rec.                | Asian     | 9                        | 6                                | 9                                  |
| MA13 | RP                  | Rec.                | Asian     | 2                        | 2                                | 4                                  |
| MA14 | RP                  | Rec.                | Asian     | 2                        | 2                                | 0                                  |
| MA15 | CRD                 | Rec.                | Asian     | 4                        | 4                                | 7                                  |
| MA16 | LCA                 | Rec.                | Asian     | 2                        | 2                                | 0                                  |
| MA17 | RCD                 | Rec.                | Asian     | 2                        | 2                                | 0                                  |
| MA18 | CRD                 | Rec.                | Asian     | 3                        | 3                                | 4                                  |
| MA19 | RCD                 | Rec.                | Asian     | 8                        | 3                                | 3                                  |
| MA20 | RP                  | Rec.                | Asian     | 2                        | 2                                | 5                                  |

The ID, diagnosis, inheritance pattern, ethnicity, number of cases and numbers sampled are shown. LCA = leber congenital amaurosis; CRD = cone rod dystrophy; RP = retinitis pigmentosa; MD = macular dystrophy and RCD = rod cone dystrophy.

Supplementary Table S2 Gene list of 162 used to generate the targeted reagent.

|       |          |         |        |        |         |          |          |      |
|-------|----------|---------|--------|--------|---------|----------|----------|------|
| ABCA4 | CA4      | COL11A1 | GUCY2D | NDP    | PDE6C   | RDH12    | SNRNP200 | VCAN |
| ABCC6 | CABP4    | CRB1    | HMCN1  | NPHP1  | PDZD7   | RDH5     | SPATA7   | WFS1 |
| ADAM9 | CACNA1F  | CRX     | HTRA1  | NPHP3  | PEX1    | RGR      | TEAD1    |      |
| AHI1  | CACNA2D4 | CYP4V2  | IDH3B  | NPHP4  | PEX7    | RGS9     | TIMM8A   |      |
| AIPL1 | CC2D2A   | DFNB31  | IMPDH1 | NR2E3  | PGK1    | RGS9BP   | TIMP3    |      |
| ALMS1 | CDH23    | DMD     | INPP5E | NRL    | PHYH    | RHO      | TLR3     |      |
| ARL6  | CEP290   | EFEMP1  | INVS   | NYX    | PITPNM3 | RIMS1    | TLR4     |      |
| ARMS2 | CERKL    | ELOVL4  | IQCB1  | OAT    | PRCD    | RLBP1    | TMEM126A |      |
| ATXN7 | CFB      | ERCC6   | JAG1   | OFD1   | PROM1   | ROM1     | TOPORS   |      |
| BBS1  | CFH      | EYS     | KCNJ13 | OPA1   | PRPF3   | RP1      | TREX1    |      |
| BBS2  | CHM      | FBLN5   | KCNV2  | OPA3   | PRPF6   | RP2      | TRIM32   |      |
| BBS4  | CLN3     | FSCN2   | KLHL7  | OPN1LW | PRPF8   | RP9      | TRPM1    |      |
| BBS5  | CLRN1    | FZD4    | LCA5   | OPN1MW | PRPF31  | RPE65    | TSPAN12  |      |
| BBS7  | CNGA1    | GNAT1   | LRAT   | OPN1SW | PRPH2   | RPGR     | TTC8     |      |
| BBS9  | CNGA3    | GNAT2   | LRP5   | OTX2   | PXMP3   | RPGRIP1  | TTPA     |      |
| BBS10 | CNGB1    | GPR98   | MERTK  | PANK2  | RAX2    | RPGRIP1L | TULP1    |      |
| BBS12 | CNGB3    | GRK1    | MFRP   | PAX2   | RB1     | RS1      | UNC119   |      |
| BEST1 | CNNM4    | GRM6    | MKKS   | PCDH15 | RBP3    | SAG      | USH1C    |      |
| C2    | COL2A1   | GUCA1A  | MTTP   | PDE6A  | RBP4    | SDCCAG8  | USH1G    |      |
| C3    | COL9A1   | GUCA1B  | MYO7A  | PDE6B  | RD3     | SEMA4A   | USH2A    |      |

## Supplementary Table S3 Exons not covered in the targeted reagent.

| <b>LOCATION (hg19)</b>           | <b>EXON</b>                                                                              |
|----------------------------------|------------------------------------------------------------------------------------------|
| <b>chr1:196670427-196670481</b>  | <b>CFH terminal exon of NM_001014975.2 / ENST00000359637</b>                             |
| <b>chr4:16004948-16004992</b>    | <b>PROM1 4bp terminal exon in one UCSC transcript only (non CCDS, refseq or Ensembl)</b> |
| <b>chr4:47972892-47973137</b>    | <b>CNGA1 first exon of CCDS47050.1</b>                                                   |
| <b>chr6:66042196-66042330</b>    | <b>EYS terminal exon of CCDS47446.1</b>                                                  |
| <b>chr10:102777320-102777392</b> | <b>PDZD7 terminal exon of CCDS31269.1</b>                                                |
| <b>chr14:88881544-88881630</b>   | <b>SPATA7 3rd exon of uc001xws.2 (non-ccds refseq or Ensembl)</b>                        |
| <b>chr16:53656110-53656288</b>   | <b>RPGRIP1L exon 19 of CCDS32447.1</b>                                                   |
| <b>chrX:38144793-38146598</b>    | <b>RPGR terminal exon of one UCSC transcript only (ORF15)</b>                            |
| <b>chrX:85226551-85226610</b>    | <b>CHM terminal exon of CCDS48139.1</b>                                                  |

# Supplementary Table S4 List of candidate variants in the 4 patient verification study.

| Chr | Position | Gene      | Coding Effect | cDNA change  | Protein change                   | BLOSUM62                 | AGVGD class  | SIFTprediction | MAPPprediction     | Zygosity           |            |
|-----|----------|-----------|---------------|--------------|----------------------------------|--------------------------|--------------|----------------|--------------------|--------------------|------------|
| (A) | 1        | 216219858 | <i>USH2A</i>  | missense     | NM_206933.2:c.6240G>T            | p.Lys2080Asn             | 0            | C0             | Tolerated          | good               | Het        |
|     | 4        | 47954624  | <i>CNGA1</i>  | missense     | NM_001142564.1:c.302G>A          | p.Arg101Gln              | 1            | C0             | Tolerated          | good               | Het        |
|     | 7        | 33136162  | <i>RP9</i>    | missense     | NM_203288.1:c.410A>T             | p.His137Leu              | <b>-3</b>    | <b>C15</b>     | <b>Deleterious</b> | <b>bad</b>         | Het        |
|     | 8        | 55541086  | <i>RP1</i>    | missense     | NM_006269.1:c.4644T>G            | p.Ser1548Arg             | <b>-1</b>    | C0             | Tolerated          | <b>bad</b>         | Het        |
|     | 9        | 2718127   | <i>KCNV2</i>  | missense     | NM_133497.3:c.388A>C             | p.Thr130Pro              | <b>-1</b>    | C0             | <b>Deleterious</b> | <b>bad</b>         | Het        |
|     | 9        | 120470884 | <i>TLR4</i>   | missense     | NM_138554.3:c.137A>G             | p.Tyr46Cys               | <b>-2</b>    | <b>C15</b>     | Tolerated          | <b>bad</b>         | Het        |
|     | 17       | 79502218  | <i>FSCN2</i>  | missense     | NM_001077182.2:c.967G>A          | p.Ala323Thr              | 0            | C0             | Tolerated          | good               | Het        |
| (B) | 6        | 11374     | <i>C2</i>     | splicing     | NM_000063.4:c.617-5C>A           | p.?                      | NA           | NA             | NA                 | NA                 | Het        |
|     | 1        | 186045644 | <i>HMCN1</i>  | missense     | NM_031935.2:c.8375A>G            | p.Asn2792Ser             | 1            | <b>C45</b>     | <b>Deleterious</b> | <b>Bad</b>         | Het        |
|     | 1        | 197390534 | <i>CRB1</i>   | nonsense     | NM_201253.2:c.1576C>T            | p.Arg526*                | NA           | NA             | NA                 | NA                 | Het        |
|     | 1        | 197404300 | <i>CRB1</i>   | missense     | NM_201253.2:c.3307G>A            | p.Gly1103Arg             | <b>-2</b>    | <b>C25</b>     | <b>Deleterious</b> | <b>bad</b>         | Het        |
|     | 1        | 215953246 | <i>USH2A</i>  | missense     | NM_206933.2:c.10878G>T           | p.Arg3626Ser             | <b>-1</b>    | C0             | Tolerated          | good               | Het        |
|     | 4        | 619426    | <i>PDE6B</i>  | missense     | NM_000283.3:c.11G>T              | p.Ser41Ile               | <b>-2</b>    | C0             | <b>Deleterious</b> | good               | Het        |
|     | 6        | 135811814 | <i>AHI1</i>   | missense     | NM_017651.4:c.82C>T              | p.Arg28Cys               | <b>-3</b>    | C0             | Tolerated          | unknown            | Het        |
|     | 9        | 117266891 | <i>DFNB31</i> | missense     | NM_015404.3:c.191C>A             | p.Ala64Asp               | <b>-2</b>    | C0             | <b>Deleterious</b> | <b>bad</b>         | Het        |
|     | 10       | 102782113 | <i>PDZD7</i>  | missense     | NM_001195263.1:c.572T>A          | p.Val191Glu              | <b>-2</b>    | <b>C65</b>     | <b>Deleterious</b> | <b>bad</b>         | Het        |
|     | 12       | 88472996  | <i>CEP290</i> | missense     | NM_025114.3:c.5237G>A            | p.Arg1746Gln             | 1            | C0             | Tolerated          | good               | Het        |
|     | X        | 31676133  | <i>DMD</i>    | missense     | NM_004006.2:c.8001T>A            | p.Asn2667Lys             | 0            | <b>C65</b>     | <b>Deleterious</b> | <b>bad</b>         | Homo       |
|     | X        | 38147286  | <i>RPGR</i>   | in-frame     | NM_001034853.1:c.1579_1581delTTG | p.Gln527del              | NA           | NA             | NA                 | NA                 | Het        |
|     | (C)      | 1         | 186158843     | <i>HMCN1</i> | missense                         | NM_031935.2:c.16741G>A   | p.Ala5581Thr | 0              | C0                 | <b>Deleterious</b> | <b>bad</b> |
| 1   |          | 216052344 | <i>USH2A</i>  | missense     | NM_206933.2:c.8320G>A            | p.Ala2774Thr             | 0            | C0             | Tolerated          | good               | Homo       |
| 2   |          | 110962496 | <i>NPHP1</i>  | missense     | NM_000272.3:c.50A>G              | p.Asn17Ser               | 1            | C0             | Tolerated          | good               | Het        |
| 8   |          | 55533891  | <i>RP1</i>    | missense     | NM_006269.1:c.365G>C             | p.Arg122Pro              | <b>-2</b>    | <b>C15</b>     | <b>Deleterious</b> | <b>bad</b>         | Het        |
| 8   |          | 55538727  | <i>RP1</i>    | frameshift   | NM_006269.1:c.2285_2289delTAAAT  | p.Leu762Tyrfs*17         | NA           | NA             | NA                 | NA                 | Het        |
| 10  |          | 50732202  | <i>ERCC6</i>  | missense     | NM_000124.2:c.1274A>C            | p.Asp425Ala              | <b>-2</b>    | <b>C65</b>     | <b>Deleterious</b> | <b>bad</b>         | Het        |
| 10  |          | 73270907  | <i>CDH23</i>  | missense     | NM_022124.5:c.367G>C             | p.Gly123Arg              | <b>-2</b>    | <b>C15</b>     | <b>Deleterious</b> | <b>bad</b>         | Het        |
| 11  |          | 76891457  | <i>MYO7A</i>  | missense     | NM_000260.3:c.2624C>G            | p.Ala875Gly              | 0            | C0             | Tolerated          | <b>bad</b>         | Het        |
| 16  |          | 57950041  | <i>CNGB1</i>  | missense     | NM_001297.4:c.2209C>T            | p.Arg737Cys              | <b>-3</b>    | C0             | Tolerated          | good               | Het        |
| X   |          | 38156584  | <i>RPGR</i>   | missense     | NM_001034853.1:c.1367A>G         | p.Gln456Arg              | 1            | C0             | Tolerated          | <b>bad</b>         | Het        |
| (D) |          | 3         | 121500697     | <i>IQCB1</i> | missense                         | NM_001023570.2:c.1303C>T | p.Arg435Cys  | <b>-3</b>      | C0                 | <b>Deleterious</b> | <b>bad</b> |
|     | 7        | 128415833 | <i>OPN1SW</i> | missense     | NM_001708.2:c.12G>A              | p.Met4Ile                | 1            | C0             | <b>Deleterious</b> | <b>bad</b>         | Het        |
|     | 19       | 54621976  | <i>PRPF31</i> | frameshift   | NM_015629.3:c.201delT            | p.Ile67Metfs*14          | NA           | NA             | NA                 | NA                 | Het        |

The diagnosis of the patients was either RP (for A, C and D) or LCA (for B). The chromosome and position of the variants are depicted according to the human genome assembly, hg19. Text in bold and italicised highlights potential pathogenic missense variants. For BLOSUM62, high pathogenicity=<0; AGVGD, high pathogenicity=C15 to C65; SIFT prediction, high pathogenicity=deleterious; MAPP prediction, high pathogenicity=bad. Homo = homozygous. Het = heterozygous.

# Supplementary Table S5. List of variants in the 20 patient study after filtering (MA1-MA20)

| Segregates | Chr | Position | Gene | Coding Effect | cDNA change | Protein change | BLOSUM62 | AGVGD class | SIFT prediction | MAPP prediction | Zygosity | Protein Domain | Reference |
|------------|-----|----------|------|---------------|-------------|----------------|----------|-------------|-----------------|-----------------|----------|----------------|-----------|
|------------|-----|----------|------|---------------|-------------|----------------|----------|-------------|-----------------|-----------------|----------|----------------|-----------|

## MA1: female, family history suggests LCA and recessive inheritance

|     |    |                  |             |                   |                                      |                    |    |            |                    |            |      |                            |  |
|-----|----|------------------|-------------|-------------------|--------------------------------------|--------------------|----|------------|--------------------|------------|------|----------------------------|--|
|     | 1  | 186010250        | HMCN1       | missense          | NM_031935.2:c.6286A>G                | p.Ile2096Val       | 3  | C0         | Tolerated          | good       | Homo | Immunoglobulin I-set       |  |
|     | 1  | 215820993        | USH2A       | missense          | NM_206933.2:c.14662A>T               | p.Thr4888Ser       | 1  | C0         | Tolerated          | good       | Het  | Fibronectin, type III      |  |
|     | 1  | 216405368        | USH2A       | missense          | NM_206933.2:c.2920G>A                | p.Asp974Asn        | 1  | <b>C15</b> | <b>Deleterious</b> | <b>bad</b> | Het  | EGF-like, laminin          |  |
|     | 1  | 216496929        | USH2A       | missense          | NM_206933.2:c.1437C>A                | p.Phe479Leu        | 0  | <b>C15</b> | <b>Deleterious</b> | <b>bad</b> | Het  | Laminin, N-terminal        |  |
| YES | 1  | <b>197398744</b> | <b>CRB1</b> | <b>frameshift</b> | <b>NM_201253.2:c.2832_2842+23del</b> | <b>p.?</b>         | NA | NA         | NA                 | NA         | Homo |                            |  |
|     | 3  | 63981343         | ATXN7       | missense          | NM_001177387.1:c.1845C>G             | p.Ser615Arg        | -1 | C0         | Tolerated          | good       | Het  |                            |  |
|     | 4  | 122766846        | BBS7        | missense          | NM_176824.2:c.1043A>G                | p.Glu348Gly        | -2 | <b>C65</b> | <b>Deleterious</b> | <b>bad</b> | Het  | BBS7 protein               |  |
|     | 5  | 89925326         | GPR98       | missense          | NM_032119.3:c.1809C>A                | p.Phe603Leu        | 0  | <b>C15</b> | <b>Deleterious</b> | <b>bad</b> | Het  |                            |  |
|     | 5  | 90149261         | GPR98       | missense          | NM_032119.3:c.17365A>G               | p.Lys5789Glu       | 1  | C0         | Tolerated          | good       | Het  |                            |  |
|     | 7  | 33545217         | BBS9        | missense          | NM_198428.2:c.2258A>T                | p.Glu753Val        | -2 | C0         | <b>Deleterious</b> | <b>bad</b> | Het  |                            |  |
|     | 7  | 92140266         | PEX1        | missense          | NM_000466.2:c.1579A>G                | p.Thr527Ala        | 0  | C0         | Tolerated          | good       | Het  |                            |  |
|     | 8  | 38869207         | ADAM9       | missense          | NM_003816.2:c.226G>A                 | p.Glu76Lys         | 1  | C0         | Tolerated          | good       | Het  | Peptidase M12B, propeptide |  |
|     | 9  | 32542056         | TOPORS      | missense          | NM_005802.4:c.2467A>G                | p.Ser823Gly        | 0  | C0         | Tolerated          | good       | Het  |                            |  |
|     | 9  | 32542166         | TOPORS      | missense          | NM_005802.4:c.2357G>A                | p.Arg786Gln        | 1  | C0         | Tolerated          | good       | Het  |                            |  |
|     | 10 | 50669416         | ERCC6       | missense          | NM_000124.2:c.3965G>T                | p.Gly1322Val       | -3 | <b>C65</b> | <b>Deleterious</b> | <b>bad</b> | Het  |                            |  |
|     | 10 | 73573082         | CDH23       | missense          | NM_022124.5:c.9715T>C                | p.Ser3239Pro       | -1 | C0         | <b>Deleterious</b> | <b>bad</b> | Het  |                            |  |
|     | 15 | 31342673         | TRPM1       | missense          | NM_002420.4:c.1310G>T                | p.Gly437Val        | -3 | C0         | <b>Deleterious</b> | <b>bad</b> | Homo |                            |  |
|     | X  | 49076224         | CACNA1F     | In-frame          | NM_005183.2:c.2439_2444dupTCCTCC     | p.Glu824_Glu825dup | NA | NA         | NA                 | NA         | Het  |                            |  |

| Segregates | Chr | Position | Gene | Coding Effect | cDNA change | Protein change | BLOSUM62 | AGVGD class | SIFT prediction | MAPP prediction | Zygosity | Protein Domain | Reference |
|------------|-----|----------|------|---------------|-------------|----------------|----------|-------------|-----------------|-----------------|----------|----------------|-----------|
|------------|-----|----------|------|---------------|-------------|----------------|----------|-------------|-----------------|-----------------|----------|----------------|-----------|

**MA2: male, family history suggests CRD and recessive or dominant inheritance**

|     |    |                 |              |                 |                                 |                   |    |            |                    |            |      |                                      |      |
|-----|----|-----------------|--------------|-----------------|---------------------------------|-------------------|----|------------|--------------------|------------|------|--------------------------------------|------|
|     | 1  | 5925272         | NPHP4        | missense        | NM_015102.3:c.3706G>A           | p.Val1236Met      | 1  | C0         | <i>Deleterious</i> | <i>bad</i> | Het  |                                      |      |
| YES | 1  | <u>94471056</u> | <u>ABCA4</u> | <u>nonsense</u> | <u>NM_000350.2:c.6088C&gt;T</u> | <u>p.Arg2030*</u> | NA | NA         | NA                 | NA         | Homo | ABC transporter-like                 | [19] |
|     | 1  | 186120461       | HMCN1        | missense        | NM_031935.2:c.14738C>A          | p.Thr4913Asn      | 0  | C0         | <i>Deleterious</i> | <i>bad</i> | Het  | G2 nidogen/fibulin G2F               |      |
|     | 1  | 215914751       | USH2A        | missense        | NM_206933.2:c.11677C>A          | p.Pro3893Thr      | -1 | <b>C35</b> | <i>Deleterious</i> | <i>bad</i> | Het  | Fibronectin, type III                |      |
|     | 2  | 96950323        | SNRNP200     | missense        | NM_014014.4:c.4165G>A           | p.Val1389Ile      | 3  | C0         | Tolerated          | good       | Het  | DEAD/DEAH box type, N-terminal       |      |
|     | 4  | 15554873        | CC2D2A       | missense        | NM_001080522.2:c.2431G>A        | p.Glu811Lys       | 1  | C0         | <i>Deleterious</i> | unknown    | Het  |                                      |      |
|     | 6  | 65596607        | EYS          | missense        | NM_001142800.1:c.2975G>T        | p.Cys992Phe       | -2 | C0         | <i>Deleterious</i> | unknown    | Het  | Epidermal growth factor-like, type 3 |      |
|     | 10 | 73405717        | CDH23        | missense        | NM_022124.5:c.1270G>A           | p.Val424Met       | 1  | C0         | <i>Deleterious</i> | <i>bad</i> | Het  | Cadherin                             |      |
|     | 12 | 76740134        | BBS10        | missense        | NM_024685.3:c.1631A>G           | p.Asn544Ser       | 1  | C0         | Tolerated          | good       | Het  |                                      |      |
|     | 12 | 88480262        | CEP290       | missense        | NM_025114.3:c.4208G>C           | p.Arg1403Thr      | -1 | C0         | Tolerated          | good       | Het  |                                      |      |

**MA3: female, family history suggests RP and recessive inheritance**

|     |    |                  |              |                 |                                  |                     |    |            |                    |            |      |                         |  |
|-----|----|------------------|--------------|-----------------|----------------------------------|---------------------|----|------------|--------------------|------------|------|-------------------------|--|
|     | 6  | 137193331        | PEX7         | splicing?       | NM_000288.3:c.748-5dupT          | p.?                 | NA | NA         | NA                 | NA         | Het  |                         |  |
|     | 1  | 68910315         | RPE65        | missense        | NM_000329.2:c.394G>A             | p.Ala132Thr         | 0  | C0         | Tolerated          | good       | Het  | Carotenoid oxygenase    |  |
| YES | 1  | <u>215848379</u> | <u>USH2A</u> | <u>missense</u> | <u>NM_206933.2:c.12874A&gt;G</u> | <u>p.Asn4292Asp</u> | 1  | <b>C15</b> | <i>Deleterious</i> | <i>bad</i> | Homo | Fibronectin, type III   |  |
|     | 9  | 120475185        | TLR4         | missense        | NM_138554.3:c.779T>C             | p.Leu260Pro         | -3 | <b>C25</b> | <i>Deleterious</i> | <i>bad</i> | Het  | Toll-like receptor      |  |
|     | 9  | 139333568        | INPP5E       | missense        | NM_019892.3:c.304G>T             | p.Asp102Tyr         | -3 | C0         | <i>Deleterious</i> | good       | Het  |                         |  |
|     | 10 | 73537449         | CDH23        | missense        | NM_022124.5:c.4858G>A            | p.Val1620Met        | 1  | <b>C15</b> | <i>Deleterious</i> | <i>bad</i> | Het  | Cadherin                |  |
|     | 11 | 66291004         | BBS1         | missense        | NM_024649.4:c.908T>C             | p.Val303Ala         | 0  | <b>C25</b> | <i>Deleterious</i> | good       | Het  | WD40 repeat-like domain |  |
|     | 16 | 56536660         | BBS2         | missense        | NM_031885.3:c.865A>G             | p.Ile289Val         | 3  | C0         | Tolerated          | good       | Het  | BBS2 protein            |  |
|     | X  | 13774746         | OFD1         | missense        | NM_003611.2:c.1271A>G            | p.Asn424Ser         | 1  | C0         | <i>Deleterious</i> | good       | Het  |                         |  |

| Segregates | Chr | Position | Gene | Coding Effect | cDNA change | Protein change | BLOSUM62 | AGVGD class | SIFT prediction | MAPP prediction | Zygosity | Protein Domain | Reference |
|------------|-----|----------|------|---------------|-------------|----------------|----------|-------------|-----------------|-----------------|----------|----------------|-----------|
|------------|-----|----------|------|---------------|-------------|----------------|----------|-------------|-----------------|-----------------|----------|----------------|-----------|

**MA4: male, family history suggests RP and recessive inheritance**

|     |    |           |        |            |                          |                  |    |            |                    |            |      |                                |  |
|-----|----|-----------|--------|------------|--------------------------|------------------|----|------------|--------------------|------------|------|--------------------------------|--|
|     | 1  | 5969225   | NPHP4  | missense   | NM_015102.3:c.1490C>G    | p.Pro497Arg      | -2 | C0         | <b>Deleterious</b> | <b>bad</b> | Het  |                                |  |
|     | 1  | 94544183  | ABCA4  | missense   | NM_000350.2:c.1319A>G    | p.Tyr440Cys      | -2 | <b>C15</b> | Tolerated          | good       | Het  | Rim ABC transporter            |  |
|     | 1  | 197297965 | CRB1   | missense   | NM_201253.2:c.484G>A     | p.Val162Met      | 1  | C0         | Tolerated          | good       | Het  | EGF                            |  |
|     | 1  | 215848645 | USH2A  | missense   | NM_206933.2:c.12608A>G   | p.Gln4203Arg     | 1  | C0         | Tolerated          | good       | Het  | Fibronectin, type III          |  |
|     | 4  | 123663048 | BBS12  | start loss | NM_152618.2:c.1A>C       | p.?              | NA | NA         | NA                 | NA         | Het  |                                |  |
|     | 4  | 187118692 | CYP4V2 | missense   | NM_207352.3:c.610G>A     | p.Ala204Thr      | 0  | C0         | <b>Deleterious</b> | <b>bad</b> | Het  | Cytochrome P450                |  |
| YES | 6  | 64498971  | EYS    | missense   | NM_001142800.1:c.7558T>C | p.Phe2520Leu     | 0  | C0         | Tolerated          | unknown    | Homo | Laminin G, subdomain 2         |  |
| YES | 6  | 66204970  | EYS    | missense   | NM_001142800.1:c.334G>A  | p.Val112Ile      | 3  | C0         | Tolerated          | good       | Homo |                                |  |
|     | 6  | 135726089 | AHI1   | frameshift | NM_017651.4:c.2988delT   | p.Val997Serfs*20 | NA | NA         | NA                 | NA         | Het  |                                |  |
|     | 8  | 87645092  | CNGB3  | missense   | NM_019098.4:c.1208G>A    | p.Arg403Gln      | 1  | C0         | <b>Deleterious</b> | <b>bad</b> | Het  |                                |  |
|     | 9  | 103059231 | INVS   | missense   | NM_014425.2:c.2819G>A    | p.Arg940Gln      | 1  | C0         | Tolerated          | good       | Het  | IQ motif, EF-hand binding site |  |
|     | 10 | 73537449  | CDH23  | missense   | NM_022124.5:c.4858G>A    | p.Val1620Met     | 1  | <b>C15</b> | <b>Deleterious</b> | <b>bad</b> | Het  | Cadherin                       |  |
|     | 11 | 76893481  | MYO7A  | missense   | NM_000260.3:c.3121G>T    | p.Val1041Phe     | -1 | C0         | <b>Deleterious</b> | good       | Het  | MyTH4 domain                   |  |
|     | 12 | 48371141  | COL2A1 | missense   | NM_001844.4:c.3235G>A    | p.Ala1079Thr     | 0  | C0         | Tolerated          | good       | Het  |                                |  |
|     | 15 | 12084     | NR2E3  | missense   | NM_014249.2:c.1186G>A    | p.Gly396Arg      | -2 | <b>C65</b> | <b>Deleterious</b> | unknown    | Het  | Retinoid X receptor            |  |
|     | 17 | 63221207  | RGS9   | missense   | NM_003835.3:c.1495T>C    | p.Ser499Pro      | -1 | C0         | <b>Deleterious</b> | unknown    | Het  |                                |  |
|     | 17 | 72916365  | USH1G  | missense   | NM_173477.2:c.566G>A     | p.Arg189Gln      | 1  | C0         | Tolerated          | good       | Het  |                                |  |
|     | 17 | 79502218  | FSCN2  | missense   | NM_001077182.2:c.967G>A  | p.Ala323Thr      | 0  | C0         | Tolerated          | good       | Het  | Fascin domain                  |  |
|     | X  | 32509447  | DMD    | missense   | NM_004006.2:c.2569C>T    | p.Pro857Ser      | -1 | C0         | Tolerated          | good       | Homo | Spectrin repeat                |  |



| Segregates | Chr | Position | Gene | Coding Effect | cDNA change | Protein change | BLOSUM62 | AGVGD class | SIFT prediction | MAPP prediction | Zygosity | Protein Domain | Reference |
|------------|-----|----------|------|---------------|-------------|----------------|----------|-------------|-----------------|-----------------|----------|----------------|-----------|
|------------|-----|----------|------|---------------|-------------|----------------|----------|-------------|-----------------|-----------------|----------|----------------|-----------|

**MA5: female, family history suggests CRD and dominant inheritance**

|    |           |          |          |                               |              |    |     |             |      |      |                           |
|----|-----------|----------|----------|-------------------------------|--------------|----|-----|-------------|------|------|---------------------------|
| 1  | 215844373 | USH2A    | missense | NM_206933.2:c.14074G>A        | p.Gly4692Arg | -2 | C65 | Deleterious | bad  | Het  | Fibronectin, type III     |
| 2  | 96942978  | SNRNP200 | missense | NM_014014.4:c.5933G>C         | p.Gly1978Ala | 0  | C0  | Tolerated   | good | Het  | Sec63 domain              |
| 10 | 13336486  | PHYH     | missense | NM_006214.3:c.356C>T          | p.Thr119Met  | -1 | C0  | Deleterious | bad  | Het  | Phytanoyl-CoA dioxygenase |
| 16 | 16284103  | ABCC6    | missense | NM_001171.5:c.1553G>A         | p.Arg518Gln  | 1  | C0  | Tolerated   | good | Het  | transmembrane domain      |
| 16 | 53653005  | RPGRIP1L | missense | NM_015272.2:c.3548C>G         | p.Ala1183Gly | 0  | C0  | Deleterious | bad  | Homo |                           |
| X  | 49076224  | CACNA1F  | In-frame | NM_005183.2:c.2442_2444dupTCC | p.Glu825dup  | NA | NA  | NA          | NA   | Het  |                           |

**MA6: male, family history suggests RP and recessive inheritance**

|   |    |                 |              |                 |                                |                    |    |     |             |      |      |                                         |      |
|---|----|-----------------|--------------|-----------------|--------------------------------|--------------------|----|-----|-------------|------|------|-----------------------------------------|------|
|   | 4  | 15982163        | PROM1        | splicing?       | NM_006017.2:c.2374-4dupG       | p.?                | NA | NA  | NA          | NA   | Homo |                                         |      |
|   | 1  | 186007997       | HMCN1        | missense        | NM_031935.2:c.5888G>T          | p.Gly1963Val       | -3 | C0  | Tolerated   | good | Het  | Immunoglobulin I-set                    |      |
|   | 5  | 82836537        | VCAN         | missense        | NM_004385.4:c.7715C>T          | p.Ser2572Leu       | -2 | C65 | Deleterious | bad  | Het  |                                         |      |
|   | 10 | 86008700        | RGR          | missense        | NM_002921.3:c.271G>A           | p.Gly91Ser         | 0  | C55 | Deleterious | good | Het  | GPCR, rhodopsin-like, 7TM               |      |
| R | 14 | <u>68193850</u> | <u>RDH12</u> | <u>missense</u> | <u>NM_152443.2:c.601T&gt;C</u> | <u>p.Cys201Arg</u> | -3 | C0  | Deleterious | bad  | Homo | Short-chain dehydrogenase/reductase SDR | [21] |
|   | 15 | 73029831        | BBS4         | missense        | NM_033028.3:c.1463C>A          | p.Thr488Lys        | -1 | C0  | Tolerated   | good | Het  |                                         |      |

**MA7: male, family history suggests CRD and dominant inheritance**

|     |    |                 |              |                 |                                 |                    |    |     |             |         |     |                                       |         |
|-----|----|-----------------|--------------|-----------------|---------------------------------|--------------------|----|-----|-------------|---------|-----|---------------------------------------|---------|
|     | 6  | 66063346        | EYS          | splicing?       | NM_001142800.1:c.1459+5C>T      | p.?                | NA | NA  | NA          | NA      | Het |                                       |         |
|     | 2  | 71134           | ALMS1        | missense        | NM_015120.4:c.5362A>G           | p.Asn1788Asp       | 1  | C0  | Tolerated   | unknown | Het |                                       |         |
|     | 2  | 112722801       | MERTK        | missense        | NM_006343.2:c.791C>G            | p.Ala264Gly        | 0  | C55 | Deleterious | bad     | Het | Immunoglobulin-like                   |         |
| YES | 4  | <u>16014922</u> | <u>PROM1</u> | <u>missense</u> | <u>NM_006017.2:c.1117C&gt;T</u> | <u>p.Arg373Cys</u> | -3 | C0  | Deleterious | bad     | Het | Prominin                              | [22,23] |
|     | 5  | 178413684       | GRM6         | missense        | NM_000843.3:c.1571C>T           | p.Pro524Leu        | -3 | C65 | Deleterious | bad     | Het | GPCR, family 3, nine cysteines domain |         |
|     | 16 | 53692694        | RPGRIP1L     | missense        | NM_015272.2:c.1340T>C           | p.Leu447Ser        | -2 | C0  | Tolerated   | good    | Het |                                       |         |

| Segregates | Chr | Position | Gene | Coding Effect | cDNA change | Protein change | BLOSUM62 | AGVGD class | SIFT prediction | MAPP prediction | Zygosity | Protein Domain | Reference |
|------------|-----|----------|------|---------------|-------------|----------------|----------|-------------|-----------------|-----------------|----------|----------------|-----------|
|------------|-----|----------|------|---------------|-------------|----------------|----------|-------------|-----------------|-----------------|----------|----------------|-----------|

**MA8: male, family history suggests RP with maculopathy and dominant or X-linked inheritance**

|     |    |                 |            |                 |                                  |                       |    |            |                    |            |      |                                            |  |
|-----|----|-----------------|------------|-----------------|----------------------------------|-----------------------|----|------------|--------------------|------------|------|--------------------------------------------|--|
|     | 4  | 15982163        | PROM1      | splicing?       | NM_006017.2:c.2374-4dupG         | p.?                   | NA | NA         | NA                 | NA         | Het  |                                            |  |
|     | X  | 18674770        | RS1        | splicing?       | NM_000330.3:c.184+3G>T           | p.?                   | NA | NA         | NA                 | NA         | Het  |                                            |  |
| YES | X  | <b>46736939</b> | <b>RP2</b> | <b>splicing</b> | <b>NM_006915.2:c.884-1G&gt;T</b> | <b>p.?</b>            | NA | NA         | NA                 | NA         | Homo |                                            |  |
|     | 1  | 103400669       | COL11A1    | missense        | NM_080629.2:c.3475G>A            | p.Gly1159Ser          | 0  | <b>C55</b> | <b>Deleterious</b> | good       | Het  |                                            |  |
|     | 1  | 215844373       | USH2A      | missense        | NM_206933.2:c.14074G>A           | p.Gly4692Arg          | -2 | <b>C65</b> | <b>Deleterious</b> | <b>bad</b> | Het  | Fibronectin, type III                      |  |
|     | 5  | 89969880        | GPR98      | missense        | NM_032119.3:c.4939A>G            | p.Ile1647Val          | 3  | C0         | Tolerated          | good       | Het  | Na-Ca exchanger/integrin-beta4             |  |
|     | 10 | 13320305        | PHYH       | in-frame        | NM_006214.3:c.1010_1012dupGAT    | p.Asn337_Leu338insHis | NA | NA         | NA                 | NA         | Het  |                                            |  |
|     | 11 | 119216627       | MFRP       | missense        | NM_031433.2:c.283G>A             | p.Ala95Thr            | 0  | C0         | Tolerated          | good       | Het  |                                            |  |
|     | 15 | 31294159        | TRPM1      | missense        | NM_002420.4:c.4678G>A            | p.Val1560Met          | 1  | C0         | <b>Deleterious</b> | good       | Het  |                                            |  |
| NO  | 15 | 6267            | NR2E3      | nonsense        | NM_014249.2:c.300C>A             | p.Cys100*             | NA | NA         | NA                 | NA         | Het  | Zinc finger, nuclear hormone receptor-type |  |
| A   | X  | 38182144        | RPGR       | missense        | NM_001034853.1:c.209G>A          | p.Gly70Glu            | -2 | C0         | <b>Deleterious</b> | <b>bad</b> | Het  | Regulator of chromosome condensation, RCC1 |  |

**MA9: female, family history suggests Macular dystrophy and dominant inheritance**

|     |    |                |               |                 |                                 |                    |    |            |                    |            |      |                            |         |
|-----|----|----------------|---------------|-----------------|---------------------------------|--------------------|----|------------|--------------------|------------|------|----------------------------|---------|
|     | 4  | 15982163       | PROM1         | splicing?       | NM_006017.2:c.2374-4dupG        | p.?                | NA | NA         | NA                 | NA         | Homo |                            |         |
|     | 16 | 53683031       | RPGRIP1L      | splicing?       | NM_015272.2:c.2153-4G>C         | p.?                | NA | NA         | NA                 | NA         | Het  |                            |         |
| NO  | 1  | 186141213      | HMCN1         | missense        | NM_031935.2:c.15764T>C          | p.Ile5255Thr       | -1 | <b>C65</b> | <b>Deleterious</b> | <b>bad</b> | Het  | EGF-like calcium-binding   |         |
|     | 1  | 216172258      | USH2A         | missense        | NM_206933.2:c.6628C>G           | p.Pro2210Ala       | -1 | <b>C25</b> | <b>Deleterious</b> | <b>bad</b> | Het  | Fibronectin, type III      |         |
|     | 16 | 53653005       | RPGRIP1L      | missense        | NM_015272.2:c.3548C>G           | p.Ala1183Gly       | 0  | C0         | <b>Deleterious</b> | <b>bad</b> | Het  |                            |         |
| YES | 17 | <b>7918018</b> | <b>GUCY2D</b> | <b>missense</b> | <b>NM_000180.3:c.2512C&gt;T</b> | <b>p.Arg838Cys</b> | -3 | <b>C65</b> | <b>Deleterious</b> | <b>bad</b> | Het  | Haem NO binding associated | [24,25] |
|     | 20 | 10393439       | MKKS          | missense        | NM_170784.1:c.724G>T            | p.Ala242Ser        | 1  | <b>C15</b> | <b>Deleterious</b> | good       | Het  | Chaperonin Cpn60/TCP-1     |         |

| Segregates | Chr | Position | Gene | Coding Effect | cDNA change | Protein change | BLOSUM62 | AGVGD class | SIFT prediction | MAPP prediction | Zygosity | Protein Domain | Reference |
|------------|-----|----------|------|---------------|-------------|----------------|----------|-------------|-----------------|-----------------|----------|----------------|-----------|
|------------|-----|----------|------|---------------|-------------|----------------|----------|-------------|-----------------|-----------------|----------|----------------|-----------|

**MA10: female, family history suggests CRD and recessive inheritance**

|     |    |                 |                |                 |                                 |                   |    |     |                    |             |      |                                      |      |
|-----|----|-----------------|----------------|-----------------|---------------------------------|-------------------|----|-----|--------------------|-------------|------|--------------------------------------|------|
|     | 1  | 215960153       | USH2A          | missense        | NM_206933.2:c.10246T>G          | p.Cys3416Gly      | -3 | C65 | <i>Deleterious</i> | <i>bad</i>  | Het  | Fibronectin, type III                |      |
|     | 1  | 216062306       | USH2A          | missense        | NM_206933.2:c.7685T>C           | p.Val2562Ala      | 0  | C0  | Tolerated          | good        | Het  | Fibronectin, type III                |      |
|     | 2  | 96942928        | SNRNP200       | missense        | NM_014014.4:c.5983G>A           | p.Ala1995Thr      | 0  | C0  | Tolerated          | good        | Het  | Sec63 domain                         |      |
|     | 5  | 82835550        | VCAN           | missense        | NM_004385.4:c.6728C>G           | p.Thr2243Arg      | -1 | C0  | Tolerated          | good        | Het  |                                      |      |
|     | 9  | 139326278       | INPP5E         | missense        | NM_019892.3:c.1547A>G           | p.Lys516Arg       | 2  | C0  | Tolerated          | good        | Het  | Endonuclease/exonuclease/phosphatase |      |
|     | 10 | 73337684        | CDH23          | missense        | NM_022124.5:c.767G>A            | p.Arg256His       | 0  | C0  | <i>Deleterious</i> | <i>bad</i>  | Het  | Cadherin                             |      |
|     | 11 | 17531058        | USH1C          | missense        | NM_153676.3:c.1858C>T           | p.Arg620Cys       | -3 | C0  | <i>Deleterious</i> | unknown     | Het  |                                      |      |
|     | 12 | 2022196         | CACNA2D4       | missense        | NM_172364.4:c.419C>G            | p.Ala140Gly       | 0  | C0  | <i>Deleterious</i> | <i>good</i> | Het  |                                      |      |
| YES | 14 | <b>21813304</b> | <b>RPGRIP1</b> | <b>nonsense</b> | <b>NM_020366.3:c.3565C&gt;T</b> | <b>p.Arg1189*</b> | NA | NA  | NA                 | NA          | Homo | -                                    | [26] |
|     | 15 | 73028295        | BBS4           | missense        | NM_033028.3:c.1236A>T           | p.Glu412Asp       | 2  | C0  | Tolerated          | good        | Het  |                                      |      |
|     | 16 | 53698905        | RPGRIP1L       | missense        | NM_015272.2:c.1120C>T           | p.His374Tyr       | 2  | C15 | <i>Deleterious</i> | good        | Het  |                                      |      |
|     | 17 | 79503621        | FSCN2          | missense        | NM_001077182.2:c.1151C>A        | p.Ala384Glu       | -1 | C0  | Not scored         | unknown     | Het  |                                      |      |

| Segregates | Chr | Position | Gene | Coding Effect | cDNA change | Protein change | BLOSUM62 | AGVGD class | SIFT prediction | MAPP prediction | Zygosity | Protein Domain | Reference |
|------------|-----|----------|------|---------------|-------------|----------------|----------|-------------|-----------------|-----------------|----------|----------------|-----------|
|------------|-----|----------|------|---------------|-------------|----------------|----------|-------------|-----------------|-----------------|----------|----------------|-----------|

**MA11: male, family history suggests RP and recessive inheritance**

|     |    |                 |             |                 |                                 |                    |           |            |                    |            |      |                                                           |      |
|-----|----|-----------------|-------------|-----------------|---------------------------------|--------------------|-----------|------------|--------------------|------------|------|-----------------------------------------------------------|------|
|     | 1  | 6012898         | NPHP4       | splicing        | NM_015102.3:c.674-2A>G          | p.?                | NA        | NA         | NA                 | NA         | Het  |                                                           |      |
|     | 1  | 94467548        | ABCA4       | missense        | NM_000350.2:c.6148G>C           | p.Val2050Leu       | 1         | <b>C25</b> | <b>Deleterious</b> | <b>bad</b> | Het  | ABC transporter-like                                      |      |
|     | 1  | 216011442       | USH2A       | missense        | NM_206933.2:c.9262G>A           | p.Glu3088Lys       | 1         | <b>C55</b> | <b>Deleterious</b> | <b>bad</b> | Het  | Fibronectin, type III                                     |      |
|     | 4  | 16077349        | PROM1       | missense        | NM_006017.2:c.181A>G            | p.Ile61Val         | 3         | C0         | Tolerated          | good       | Het  | Prominin                                                  |      |
|     | 6  | 42153428        | GUCA1B      | missense        | NM_002098.5:c.465G>T            | p.Glu155Asp        | 2         | C0         | Tolerated          | good       | Het  | EF-HAND 2                                                 |      |
|     | 6  | 80626456        | ELOVL4      | missense        | NM_022726.3:c.814G>C            | p.Glu272Gln        | 2         | C0         | Tolerated          | good       | Het  | GNS1/SUR4 membrane protein                                |      |
|     | 9  | 2718127         | KCNV2       | missense        | NM_133497.3:c.388A>C            | p.Thr130Pro        | -1        | C0         | <b>Deleterious</b> | <b>bad</b> | Het  | Potassium channel, voltage dependent, Kv, tetramerisation |      |
|     | 9  | 120476583       | TLR4        | missense        | NM_138554.3:c.2177G>T           | p.Gly726Val        | -3        | <b>C65</b> | <b>Deleterious</b> | <b>bad</b> | Het  | Toll/interleukin-1 receptor homology domain               |      |
|     | 11 | 76883864        | MYO7A       | missense        | NM_000260.3:c.1868G>A           | p.Arg623His        | 0         | C0         | <b>Deleterious</b> | good       | Het  | Myosin head, motor domain                                 |      |
|     | 12 | 1908849         | CACNA2D4    | missense        | NM_172364.4:c.2987T>C           | p.Phe996Ser        | -2        | C0         | Tolerated          | unknown    | Het  |                                                           |      |
|     | 16 | 53686789        | RPGRIP1L    | missense        | NM_015272.2:c.1810G>A           | p.Glu604Lys        | 1         | C0         | <b>Deleterious</b> | <b>bad</b> | Het  | Protein of unknown function DUF3250                       |      |
| YES | 16 | <b>56530894</b> | <b>BBS2</b> | <b>missense</b> | <b>NM_031885.3:c.1895G&gt;C</b> | <b>p.Arg632Pro</b> | <b>-2</b> | <b>C15</b> | Tolerated          | <b>bad</b> | Homo | BBS2 protein                                              | [27] |
| A   | X  | 49082958        | CACNA1F     | missense        | NM_005183.2:c.1409T>C           | p.Leu470Pro        | -3        | C0         | <b>Deleterious</b> | <b>bad</b> | Het  |                                                           |      |

| Segregates | Chr | Position | Gene | Coding Effect | cDNA change | Protein change | BLOSUM62 | AGVGD class | SIFT prediction | MAPP prediction | Zygosity | Protein Domain | Reference |
|------------|-----|----------|------|---------------|-------------|----------------|----------|-------------|-----------------|-----------------|----------|----------------|-----------|
|------------|-----|----------|------|---------------|-------------|----------------|----------|-------------|-----------------|-----------------|----------|----------------|-----------|

### MA12: male, family history suggests CRD and recessive inheritance

|    |    |          |        |           |                          |              |    |            |                    |            |      |                                                           |  |
|----|----|----------|--------|-----------|--------------------------|--------------|----|------------|--------------------|------------|------|-----------------------------------------------------------|--|
|    | 4  | 15982163 | PROM1  | splicing? | NM_006017.2:c.2374-4dupG | p.?          | NA | NA         | NA                 | NA         | Homo |                                                           |  |
|    | 16 | 56534761 | BBS2   | splicing? | NM_031885.3:c.1397+5C>G  | p.?          | NA | NA         | NA                 | NA         | Het  |                                                           |  |
|    | 6  | 5304     | CFB    | missense  | NM_001710.5:c.26T>A      | p.Leu9His    | -3 | C0         | <i>Deleterious</i> | <i>bad</i> | Het  | Complement B/C2                                           |  |
|    | 9  | 2718127  | KCNV2  | missense  | NM_133497.3:c.388A>C     | p.Thr130Pro  | -1 | C0         | <i>Deleterious</i> | <i>bad</i> | Het  | Potassium channel, voltage dependent, Kv, tetramerisation |  |
| NO | 10 | 73553052 | CDH23  | missense  | NM_022124.5:c.6367G>A    | p.Gly2123Arg | -2 | <b>C65</b> | <i>Deleterious</i> | <i>bad</i> | Het  | Cadherin                                                  |  |
| NO | 10 | 73563067 | CDH23  | missense  | NM_022124.5:c.7762G>C    | p.Glu2588Gln | 2  | C0         | Tolerated          | good       | Het  | Cadherin                                                  |  |
|    | 12 | 76740134 | BBS10  | missense  | NM_024685.3:c.1631A>G    | p.Asn544Ser  | 1  | C0         | Tolerated          | good       | Het  |                                                           |  |
|    | 12 | 88454728 | CEP290 | missense  | NM_025114.3:c.6401T>C    | p.Ile2134Thr | -1 | C0         | <i>Deleterious</i> | <i>bad</i> | Het  |                                                           |  |
|    | 17 | 63221207 | RGS9   | missense  | NM_003835.3:c.1495T>C    | p.Ser499Pro  | -1 | C0         | <i>Deleterious</i> | unknown    | Het  |                                                           |  |
|    | 17 | 72916338 | USH1G  | missense  | NM_173477.2:c.593A>C     | p.His198Pro  | -2 | C0         | Tolerated          | <i>bad</i> | Het  |                                                           |  |
|    | 20 | 10625830 | JAG1   | missense  | NM_000214.2:c.2188A>G    | p.Met730Val  | 1  | C0         | Tolerated          | <i>bad</i> | Het  | EGF, extracellular                                        |  |

### MA13: female, family history suggests RP and recessive inheritance

|    |    |           |        |          |                        |              |    |            |                    |            |     |                                                           |  |
|----|----|-----------|--------|----------|------------------------|--------------|----|------------|--------------------|------------|-----|-----------------------------------------------------------|--|
|    | 4  | 100503136 | MTTP   | missense | NM_000253.2:c.136C>G   | p.Arg46Gly   | -2 | C0         | Tolerated          | good       | Het | Lipid transport protein, N-terminal                       |  |
| NO | 5  | 89924514  | GPR98  | missense | NM_032119.3:c.1374T>A  | p.Phe458Leu  | 0  | <b>C15</b> | <i>Deleterious</i> | <i>bad</i> | Het |                                                           |  |
| A  | 5  | 90149261  | GPR98  | missense | NM_032119.3:c.17365A>G | p.Lys5789Glu | 1  | C0         | Tolerated          | good       | Het |                                                           |  |
|    | 9  | 2718127   | KCNV2  | missense | NM_133497.3:c.388A>C   | p.Thr130Pro  | -1 | C0         | <i>Deleterious</i> | <i>bad</i> | Het | Potassium channel, voltage dependent, Kv, tetramerisation |  |
|    | 9  | 117266942 | DFNB31 | missense | NM_015404.3:c.140C>A   | p.Thr47Asn   | 0  | C0         | Tolerated          | good       | Het |                                                           |  |
|    | 11 | 76891457  | MYO7A  | missense | NM_000260.3:c.2624C>G  | p.Ala875Gly  | 0  | C0         | Tolerated          | <i>bad</i> | Het |                                                           |  |
|    | 11 | 76910630  | MYO7A  | missense | NM_000260.3:c.4619C>T  | p.Ala1540Val | 0  | C0         | Tolerated          | unknown    | Het | FERM domain                                               |  |

| Segregates | Chr | Position | Gene | Coding Effect | cDNA change | Protein change | BLOSUM62 | AGVGD class | SIFT prediction | MAPP prediction | Zygosity | Protein Domain | Reference |
|------------|-----|----------|------|---------------|-------------|----------------|----------|-------------|-----------------|-----------------|----------|----------------|-----------|
|------------|-----|----------|------|---------------|-------------|----------------|----------|-------------|-----------------|-----------------|----------|----------------|-----------|

**MA14: male, family history suggests RP and recessive inheritance**

|     |    |           |          |           |                         |             |    |            |                    |            |      |                                                           |  |
|-----|----|-----------|----------|-----------|-------------------------|-------------|----|------------|--------------------|------------|------|-----------------------------------------------------------|--|
|     | 6  | 137193331 | PEX7     | splicing? | NM_000288.3:c.748-5dupT | p.?         | NA | NA         | NA                 | NA         | Het  |                                                           |  |
|     | 4  | 15517532  | CC2D2A   | missense  | NM_001080522.2:c.922T>C | p.Phe308Leu | 0  | C0         | Tolerated          | good       | Het  |                                                           |  |
| A   | 4  | 123664710 | BBS12    | missense  | NM_152618.2:c.1663G>A   | p.Glu555Lys | 1  | C0         | Tolerated          | good       | Het  | Chaperonin Cpn60/TCP-1                                    |  |
| YES | 4  | 123665061 | BBS12    | missense  | NM_152618.2:c.2014G>A   | p.Ala672Thr | 0  | <b>C55</b> | <b>Deleterious</b> | <b>bad</b> | Het  |                                                           |  |
|     | 5  | 178418549 | GRM6     | missense  | NM_000843.3:c.733A>G    | p.Ile245Val | 3  | <b>C15</b> | Tolerated          | <b>bad</b> | Homo | Extracellular ligand-binding receptor                     |  |
|     | 6  | 72892193  | RIMS1    | missense  | NM_014989.4:c.1019C>T   | p.Ala340Val | 0  | C0         | Tolerated          | good       | Het  |                                                           |  |
|     | 9  | 2718127   | KCNV2    | missense  | NM_133497.3:c.388A>C    | p.Thr130Pro | -1 | C0         | <b>Deleterious</b> | <b>bad</b> | Het  | Potassium channel, voltage dependent, Kv, tetramerisation |  |
|     | 11 | 66283020  | BBS1     | missense  | NM_024649.4:c.442G>A    | p.Asp148Asn | 1  | C0         | Tolerated          | good       | Het  |                                                           |  |
|     | 11 | 119216338 | MFRP     | missense  | NM_031433.2:c.433G>A    | p.Gly145Arg | -2 | <b>C25</b> | <b>Deleterious</b> | <b>bad</b> | Het  | CUB                                                       |  |
|     | 16 | 53705492  | RPGRIP1L | missense  | NM_015272.2:c.1033C>A   | p.Gln345Lys | 1  | C0         | Tolerated          | good       | Het  |                                                           |  |
|     | 17 | 63221207  | RGS9     | missense  | NM_003835.3:c.1495T>C   | p.Ser499Pro | -1 | C0         | <b>Deleterious</b> | unknown    | Het  |                                                           |  |
| A   | 17 | 79495853  | FSCN2    | missense  | NM_001077182.2:c.296G>T | p.Arg99Leu  | -2 | C0         | <b>Deleterious</b> | <b>bad</b> | Het  | Fascin domain                                             |  |

| Segregates | Chr | Position | Gene | Coding Effect | cDNA change | Protein change | BLOSUM62 | AGVGD class | SIFT prediction | MAPP prediction | Zygosity | Protein Domain | Reference |
|------------|-----|----------|------|---------------|-------------|----------------|----------|-------------|-----------------|-----------------|----------|----------------|-----------|
|------------|-----|----------|------|---------------|-------------|----------------|----------|-------------|-----------------|-----------------|----------|----------------|-----------|

**MA15: male, family history suggests CRD and recessive inheritance**

|     |    |                 |               |                 |                                |                 |    |     |             |         |      |                                    |      |
|-----|----|-----------------|---------------|-----------------|--------------------------------|-----------------|----|-----|-------------|---------|------|------------------------------------|------|
|     | 1  | 94473807        | ABCA4         | missense        | NM_000350.2:c.5882G>A          | p.Gly1961Glu    | -2 | C65 | Deleterious | bad     | Het  | ABC transporter-like               |      |
|     | 5  | 82817313        | VCAN          | missense        | NM_004385.4:c.3188T>C          | p.Leu1063Pro    | -3 | C0  | Deleterious | bad     | Homo |                                    |      |
|     | 5  | 89948189        | GPR98         | missense        | NM_032119.3:c.3443G>A          | p.Gly1148Asp    | -1 | C65 | Deleterious | bad     | Homo |                                    |      |
|     | 6  | 64431505        | EYS           | missense        | NM_001142800.1:c.8422G>A       | p.Ala2808Thr    | 0  | C0  | Deleterious | unknown | Het  | Laminin G, subdomain 2             |      |
|     | 6  | 65300160        | EYS           | missense        | NM_001142800.1:c.5600C>T       | p.Ser1867Phe    | -2 | C0  | Deleterious | unknown | Het  |                                    |      |
|     | 8  | 55538820        | RP1           | missense        | NM_006269.1:c.2378G>T          | p.Arg793Ile     | -3 | C15 | Deleterious | bad     | Het  |                                    |      |
|     | 9  | 117266673       | DFNB31        | missense        | NM_015404.3:c.409G>C           | p.Glu137Gln     | 2  | C0  | Tolerated   | good    | Het  |                                    |      |
|     | 9  | 139333403       | INPP5E        | missense        | NM_019892.3:c.469G>T           | p.Gly157Trp     | -2 | C0  | Tolerated   | good    | Het  |                                    |      |
|     | 11 | 66291279        | BBS1          | missense        | NM_024649.4:c.1036G>A          | p.Val346Ile     | 3  | C25 | Deleterious | bad     | Het  | WD40 repeat-like-containing domain |      |
|     | 11 | 68115675        | LRP5          | missense        | NM_002335.2:c.452A>C           | p.Asp151Ala     | -2 | C65 | Deleterious | bad     | Het  | LDLR class B repeat                |      |
|     | 11 | 76891457        | MYO7A         | missense        | NM_000260.3:c.2624C>G          | p.Ala875Gly     | 0  | C0  | Tolerated   | bad     | Het  |                                    |      |
|     | 11 | 76891460        | MYO7A         | missense        | NM_000260.3:c.2627A>G          | p.Glu876Gly     | -2 | C0  | Deleterious | bad     | Het  |                                    |      |
|     | 12 | 1906632         | CACNA2D4      | missense        | NM_172364.4:c.3065C>T          | p.Pro1022Leu    | -3 | C0  | Tolerated   | unknown | Het  |                                    |      |
| YES | 14 | <u>88883069</u> | <u>SPATA7</u> | <u>nonsense</u> | <u>NM_018418.4:c.253C&gt;T</u> | <u>p.Arg85*</u> | NA | NA  | NA          | NA      | Homo | -                                  | [28] |
|     | 17 | 63221207        | RGS9          | missense        | NM_003835.3:c.1495T>C          | p.Ser499Pro     | -1 | C0  | Deleterious | unknown | Het  |                                    |      |
|     | 20 | 10622214        | JAG1          | missense        | NM_000214.2:c.2810G>A          | p.Arg937Gln     | 1  | C0  | Tolerated   | good    | Het  |                                    |      |

| Segregates | Chr | Position | Gene | Coding Effect | cDNA change | Protein change | BLOSUM62 | AGVGD class | SIFT prediction | MAPP prediction | Zygosity | Protein Domain | Reference |
|------------|-----|----------|------|---------------|-------------|----------------|----------|-------------|-----------------|-----------------|----------|----------------|-----------|
|------------|-----|----------|------|---------------|-------------|----------------|----------|-------------|-----------------|-----------------|----------|----------------|-----------|

**MA16: male, family history suggests LCA and recessive inheritance**

|     |    |                        |                     |                        |                                       |                           |    |            |                    |            |      |                                                            |      |
|-----|----|------------------------|---------------------|------------------------|---------------------------------------|---------------------------|----|------------|--------------------|------------|------|------------------------------------------------------------|------|
|     | 1  | 186072648              | HMCN1               | missense               | NM_031935.2:c.10618G>A                | p.Val3540Ile              | 3  | <b>C25</b> | <b>Deleterious</b> | <b>bad</b> | Het  | Immunoglobulin I-set                                       |      |
|     | 2  | 110187                 | ALMS1               | missense               | NM_015120.4:c.8983G>A                 | p.Val2995Ile              | 3  | C0         | Tolerated          | unknown    | Het  |                                                            |      |
|     | 2  | 169521                 | ALMS1               | missense               | NM_015120.4:c.9917A>G                 | p.Asn3306Ser              | 1  | C0         | <b>Deleterious</b> | unknown    | Het  |                                                            |      |
|     | 3  | 121518211              | IQCB1               | missense               | NM_001023570.2:c.598C>A               | p.Leu200Ile               | 2  | C0         | Tolerated          | good       | Het  |                                                            |      |
|     | 3  | 132423114              | NPHP3               | missense               | NM_153240.4:c.1452A>G                 | p.Ile484Met               | 1  | C0         | <b>Deleterious</b> | good       | Het  |                                                            |      |
|     | 5  | 90149261               | GPR98               | missense               | NM_032119.3:c.17365A>G                | p.Lys5789Glu              | 1  | C0         | Tolerated          | good       | Het  |                                                            |      |
|     | 5  | 178418555              | GRM6                | missense               | NM_000843.3:c.727G>T                  | p.Val243Phe               | -1 | C0         | Tolerated          | good       | Het  | Extracellular ligand-binding receptor                      |      |
|     | 6  | 64431505               | EYS                 | missense               | NM_001142800.1:c.8422G>A              | p.Ala2808Thr              | 0  | C0         | <b>Deleterious</b> | unknown    | Het  | Laminin G, subdomain 2                                     |      |
|     | 7  | 92157661               | PEX1                | missense               | NM_000466.2:c.89A>C                   | p.His30Pro                | -2 | C0         | Tolerated          | <b>bad</b> | Het  | Peroxisome biogenesis factor 1, alpha/beta                 |      |
|     | 8  | 38880817               | ADAM9               | missense               | NM_003816.2:c.887G>A                  | p.Arg296Gln               | 1  | C0         | Tolerated          | good       | Het  | Peptidase M12B, ADAM/reprolysin                            |      |
|     | 10 | 95400223               | PDE6C               | missense               | NM_006204.3:c.1646T>C                 | p.Met549Thr               | -1 | <b>C45</b> | <b>Deleterious</b> | <b>bad</b> | Het  |                                                            |      |
|     | 10 | 95405722               | PDE6C               | missense               | NM_006204.3:c.1853C>T                 | p.Thr618Met               | -1 | C0         | Tolerated          | good       | Het  | 3'5'-cyclic nucleotide phosphodiesterase, catalytic domain |      |
|     | 11 | 76891457               | MYO7A               | missense               | NM_000260.3:c.2624C>G                 | p.Ala875Gly               | 0  | C0         | Tolerated          | bad        | Het  |                                                            |      |
| YES | 14 | <b><u>68193755</u></b> | <b><u>RDH12</u></b> | <b><u>missense</u></b> | <b><u>NM_152443.2:c.506G&gt;A</u></b> | <b><u>p.Arg169Gln</u></b> | 1  | <b>C35</b> | <b>Deleterious</b> | <b>bad</b> | Homo | Short-chain dehydrogenase/reductase SDR                    | [29] |
|     | 15 | 31325130               | TRPM1               | missense               | NM_002420.4:c.2648A>G                 | p.Glu883Gly               | -2 | C0         | <b>Deleterious</b> | <b>bad</b> | Het  | Ion transport                                              |      |
|     | 16 | 16295863               | ABCC6               | missense               | NM_001171.5:c.1171A>G                 | p.Arg391Gly               | -2 | C0         | <b>Deleterious</b> | <b>bad</b> | Het  | transmembrane domain                                       |      |
|     | 17 | 63221207               | RGS9                | missense               | NM_003835.3:c.1495T>C                 | p.Ser499Pro               | -1 | C0         | <b>Deleterious</b> | unknown    | Het  |                                                            |      |
|     | 20 | 10389422               | MKKS                | missense               | NM_170784.1:c.1015A>G                 | p.Ile339Val               | 3  | C0         | Tolerated          | good       | Het  | Chaperonin Cpn60/TCP-1                                     |      |



| Segregates | Chr | Position | Gene | Coding Effect | cDNA change | Protein change | BLOSUM62 | AGVGD class | SIFT prediction | MAPPrediction | Zygosity | Protein Domain | Reference |
|------------|-----|----------|------|---------------|-------------|----------------|----------|-------------|-----------------|---------------|----------|----------------|-----------|
|------------|-----|----------|------|---------------|-------------|----------------|----------|-------------|-----------------|---------------|----------|----------------|-----------|

**MA17: male, family history suggests RCD and recessive inheritance**

|    |           |         |          |                            |              |    |    |                    |            |      |                                                           |     |
|----|-----------|---------|----------|----------------------------|--------------|----|----|--------------------|------------|------|-----------------------------------------------------------|-----|
| 1  | 5969225   | NPHP4   | missense | NM_015102.3:c.1490C>G      | p.Pro497Arg  | -2 | C0 | <b>Deleterious</b> | <b>bad</b> | Het  |                                                           |     |
| 1  | 185976299 | HMCN1   | missense | NM_031935.2:c.4515C>G      | p.Asp1505Glu | 2  | C0 | Tolerated          | good       | Het  | Immunoglobulin I-set                                      |     |
| 1  | 216348809 | USH2A   | missense | NM_206933.2:c.4412G>C      | p.Arg1471Thr | -1 | C0 | Tolerated          | good       | Het  |                                                           |     |
| 1  | 243652316 | SDCCAG8 | missense | NM_006642.3:c.1986G>T      | p.Arg662Ser  | -1 | C0 | <b>Deleterious</b> | <b>bad</b> | Het  |                                                           |     |
| 5  | 82816753  | VCAN    | missense | NM_004385.4:c.2628T>A      | p.His876Gln  | 0  | C0 | <b>Deleterious</b> | <b>bad</b> | Het  |                                                           |     |
| 5  | 90024663  | GPR98   | missense | NM_032119.3:c.10339G>A     | p.Glu3447Lys | 1  | C0 | Tolerated          | good       | Het  |                                                           | EAR |
| 7  | 92147143  | PEX1    | missense | NM_000466.2:c.686A>G       | p.Asn229Ser  | 1  | C0 | Tolerated          | unknown    | Het  |                                                           |     |
| 9  | 2718127   | KCNV2   | missense | NM_133497.3:c.388A>C       | p.Thr130Pro  | -1 | C0 | <b>Deleterious</b> | <b>bad</b> | Het  | Potassium channel, voltage dependent, Kv, tetramerisation |     |
| 9  | 120475128 | TLR4    | missense | NM_138554.3:c.722A>G       | p.Asn241Ser  | 1  | C0 | Tolerated          | good       | Het  | Toll-like receptor                                        |     |
| 10 | 102568919 | PAX2    | missense | ENST00000370296.1:c.914C>T | p.Ser305Leu  | -2 | C0 | Tolerated          | good       | Het  | Paired-box protein 2 C-terminal                           |     |
| 11 | 86662343  | FZD4    | missense | NM_012193.3:c.1455G>T      | p.Leu485Phe  | 0  | C0 | <b>Deleterious</b> | <b>bad</b> | Het  | Frizzled protein                                          |     |
| 12 | 88472996  | CEP290  | missense | NM_025114.3:c.5237G>A      | p.Arg1746Gln | 1  | C0 | Tolerated          | good       | Het  |                                                           |     |
| X  | 13765025  | OFD1    | missense | NM_003611.2:c.781G>A       | p.Val261Ile  | 3  | C0 | Tolerated          | good       | Homo |                                                           |     |

| Segregates | Chr | Position | Gene | Coding Effect | cDNA change | Protein change | BLOSUM62 | AGVGD class | SIFT prediction | MAPP prediction | Zygosity | Protein Domain | Reference |
|------------|-----|----------|------|---------------|-------------|----------------|----------|-------------|-----------------|-----------------|----------|----------------|-----------|
|------------|-----|----------|------|---------------|-------------|----------------|----------|-------------|-----------------|-----------------|----------|----------------|-----------|

**MA18: female, family history suggests CRD and recessive inheritance**

|     |    |                 |              |                 |                                          |                            |           |            |                    |            |      |                                     |         |
|-----|----|-----------------|--------------|-----------------|------------------------------------------|----------------------------|-----------|------------|--------------------|------------|------|-------------------------------------|---------|
| YES | 1  | <b>94508316</b> | <b>ABCA4</b> | <b>splicing</b> | <b><u>NM_000350.2:c.3328+1G&gt;C</u></b> | <b>p.?</b>                 | NA        | NA         | NA                 | NA         | Het  |                                     |         |
|     | 4  | 15982163        | PROM1        | splicing?       | NM_006017.2:c.2374-4dupG                 | p.?                        | NA        | NA         | NA                 | NA         | Het  |                                     |         |
|     | 1  | 6007259         | NPHP4        | missense        | NM_015102.3:c.1024C>T                    | p.Arg342Cys                | -3        | C0         | <b>Deleterious</b> | <b>bad</b> | Het  |                                     |         |
|     | 1  | 68904660        | RPE65        | missense        | NM_000329.2:c.963T>G                     | p.Asn321Lys                | 0         | C0         | <b>Deleterious</b> | good       | Het  | Carotenoid oxygenase                |         |
| YES | 1  | <b>94473807</b> | <b>ABCA4</b> | <b>missense</b> | <b><u>NM_000350.2:c.5882G&gt;A</u></b>   | <b><u>p.Gly1961Glu</u></b> | <b>-2</b> | <b>C65</b> | <b>Deleterious</b> | <b>bad</b> | Het  | ABC transporter-like                | [30,31] |
|     | 2  | 96950323        | SNRNP200     | missense        | NM_014014.4:c.4165G>A                    | p.Val1389Ile               | 3         | C0         | Tolerated          | good       | Het  | DEAD/DEAH box type, N-terminal      |         |
|     | 6  | 14945           | C2           | missense        | NM_000063.4:c.1103G>A                    | p.Arg368Gln                | 1         | <b>C35</b> | <b>Deleterious</b> | <b>bad</b> | Het  | von Willebrand factor, type A       |         |
|     | 10 | 48389479        | RBP3         | missense        | NM_002900.2:c.1399C>T                    | p.Pro467Ser                | -1        | C0         | <b>Deleterious</b> | <b>bad</b> | Het  | Interphotoreceptor retinol-binding  |         |
|     | 10 | 48389841        | RBP3         | missense        | NM_002900.2:c.1037G>A                    | p.Arg346His                | 0         | C0         | <b>Deleterious</b> | <b>bad</b> | Het  |                                     |         |
|     | 10 | 73551036        | CDH23        | missense        | NM_022124.5:c.6197G>A                    | p.Arg2066Gln               | 1         | C0         | Tolerated          | good       | Het  | Cadherin                            |         |
|     | 12 | 76742114        | BBS10        | missense        | NM_024685.3:c.25G>T                      | p.Gly9Trp                  | -2        | C0         | Tolerated          | unknown    | Het  |                                     |         |
|     | 12 | 88508951        | CEP290       | frameshift      | NM_025114.3:c.1833delA                   | p.Leu612Phefs*5            | NA        | NA         | NA                 | NA         | Het  |                                     |         |
|     | 14 | 89307227        | TTC8         | missense        | NM_144596.2:c.284A>G                     | p.Lys95Arg                 | 2         | C0         | Tolerated          | good       | Het  |                                     |         |
|     | 15 | 31318408        | TRPM1        | missense        | NM_002420.4:c.3497A>T                    | p.His1166Leu               | -3        | C0         | Tolerated          | good       | Het  |                                     |         |
|     | 17 | 6329946         | AIPL1        | missense        | NM_014336.3:c.773G>A                     | p.Arg258Gln                | 1         | C0         | Tolerated          | good       | Het  | Tetratricopeptide repeat-containing |         |
|     | 20 | 10393438        | MKKS         | missense        | NM_170784.1:c.725C>T                     | p.Ala242Val                | 0         | C0         | Tolerated          | good       | Het  | Chaperonin Cpn60/TCP-1              |         |
|     | X  | 31462606        | DMD          | missense        | NM_004006.2:c.9076C>T                    | p.Leu3026Phe               | 0         | C0         | <b>Deleterious</b> | good       | Het  | Spectrin repeat                     |         |
|     | X  | 153418535       | OPN1LW       | missense        | NM_020061.4:c.532A>G                     | p.Ile178Val                | 3         | C0         | Tolerated          | good       | Homo | GPCR, rhodopsin-like, 7TM           |         |

| Segregates | Chr | Position | Gene | Coding Effect | cDNA change | Protein change | BLOSUM62 | AGVGD class | SIFT prediction | MAPP prediction | Zygosity | Protein Domain | Reference |
|------------|-----|----------|------|---------------|-------------|----------------|----------|-------------|-----------------|-----------------|----------|----------------|-----------|
|------------|-----|----------|------|---------------|-------------|----------------|----------|-------------|-----------------|-----------------|----------|----------------|-----------|

**MA19: male, family history suggests RCD and recessive inheritance**

|    |    |           |        |            |                                |                  |    |            |                    |            |     |                                             |  |
|----|----|-----------|--------|------------|--------------------------------|------------------|----|------------|--------------------|------------|-----|---------------------------------------------|--|
|    | 1  | 216270422 | USH2A  | splicing?  | NM_206933.2:c.4758+3A>G        | p.?              | NA | NA         | NA                 | NA         | Het |                                             |  |
|    | 4  | 15982163  | PROM1  | splicing?  | NM_006017.2:c.2374-4dupG       | p.?              | NA | NA         | NA                 | NA         | Het |                                             |  |
| NO | 4  | 6303810   | WFS1   | missense   | NM_006005.3:c.2288A>C          | p.His763Pro      | -2 | <b>C15</b> | <b>Deleterious</b> | <b>bad</b> | Het |                                             |  |
| NO | 4  | 15513014  | CC2D2A | in-frame   | NM_001080522.2:c.685_687delGAA | p.Glu229del      | NA | NA         | NA                 | NA         | Het |                                             |  |
| A  | 4  | 15539735  | CC2D2A | missense   | NM_001080522.2:c.1978G>C       | p.Val660Leu      | 1  | C0         | Tolerated          | good       | Het |                                             |  |
|    | 4  | 123665061 | BBS12  | missense   | NM_152618.2:c.2014G>A          | p.Ala672Thr      | 0  | <b>C55</b> | <b>Deleterious</b> | <b>bad</b> | Het |                                             |  |
|    | 5  | 90149261  | GPR98  | missense   | NM_032119.3:c.17365A>G         | p.Lys5789Glu     | 1  | C0         | Tolerated          | good       | Het |                                             |  |
|    | 6  | 135787297 | AHI1   | missense   | NM_017651.4:c.404A>C           | p.Gln135Pro      | -1 | C0         | Tolerated          | unknown    | Het |                                             |  |
|    | 8  | 87645092  | CNGB3  | missense   | NM_019098.4:c.1208G>A          | p.Arg403Gln      | 1  | C0         | <b>Deleterious</b> | <b>bad</b> | Het |                                             |  |
|    | 9  | 120476570 | TLR4   | missense   | NM_138554.3:c.2164A>G          | p.Ile722Val      | 3  | <b>C25</b> | <b>Deleterious</b> | <b>bad</b> | Het | Toll/interleukin-1 receptor homology domain |  |
| A  | 10 | 55582584  | PCDH15 | frameshift | NM_001142763.1:c.4923delT      | p.Glu1642Argfs*5 | NA | NA         | NA                 | NA         | Het |                                             |  |
| A  | 10 | 55721600  | PCDH15 | missense   | NM_001142763.1:c.2936A>C       | p.Tyr979Ser      | -2 | C0         | <b>Deleterious</b> | good       | Het | Cadherin                                    |  |
|    | 12 | 76740134  | BBS10  | missense   | NM_024685.3:c.1631A>G          | p.Asn544Ser      | 1  | C0         | Tolerated          | good       | Het |                                             |  |
| A  | X  | 31854856  | DMD    | missense   | NM_004006.2:c.7179A>C          | p.Lys2393Asn     | 0  | C0         | <b>Deleterious</b> | <b>bad</b> | Het | Dystrophin/utrophin                         |  |

| Segregates | Chr | Position | Gene | Coding Effect | cDNA change | Protein change | BLOSUM62 | AGVGD class | SIFT prediction | MAPP prediction | Zygosity | Protein Domain | Reference |
|------------|-----|----------|------|---------------|-------------|----------------|----------|-------------|-----------------|-----------------|----------|----------------|-----------|
|------------|-----|----------|------|---------------|-------------|----------------|----------|-------------|-----------------|-----------------|----------|----------------|-----------|

### MA20: male, family history suggests RP and recessive inheritance

|    |    |           |          |           |                         |              |           |            |                    |            |      |                                            |  |
|----|----|-----------|----------|-----------|-------------------------|--------------|-----------|------------|--------------------|------------|------|--------------------------------------------|--|
|    | 2  | 110904416 | NPHP1    | splicing? | NM_000272.3:c.1438-4C>T | p.?          | NA        | NA         | NA                 | NA         | Het  |                                            |  |
|    | 2  | 96955677  | SNRNP200 | missense  | NM_014014.4:c.2800A>G   | p.Thr934Ala  | 0         | C0         | Tolerated          | good       | Het  |                                            |  |
|    | 5  | 90149261  | GPR98    | missense  | NM_032119.3:c.17365A>G  | p.Lys5789Glu | 1         | C0         | Tolerated          | good       | Het  |                                            |  |
|    | 6  | 42689868  | PRPH2    | missense  | NM_000322.4:c.205G>T    | p.Val69Leu   | 1         | C0         | Tolerated          | good       | Het  | Tetraspanin                                |  |
|    | 6  | 135776946 | AHI1     | missense  | NM_017651.4:c.1270A>G   | p.Ile424Val  | 3         | C0         | Tolerated          | good       | Het  |                                            |  |
|    | 11 | 76891457  | MYO7A    | missense  | NM_000260.3:c.2624C>G   | p.Ala875Gly  | 0         | C0         | Tolerated          | <b>bad</b> | Het  |                                            |  |
| A  | 12 | 88472996  | CEP290   | missense  | NM_025114.3:c.5237G>A   | p.Arg1746Gln | 1         | C0         | Tolerated          | good       | Het  |                                            |  |
| A  | 12 | 88519039  | CEP290   | missense  | NM_025114.3:c.1173G>T   | p.Glu391Asp  | 2         | C0         | Tolerated          | good       | Het  |                                            |  |
| NO | 15 | 31318408  | TRPM1    | missense  | NM_002420.4:c.3497A>T   | p.His1166Leu | <b>-3</b> | C0         | Tolerated          | good       | Homo |                                            |  |
| A  | 17 | 58233966  | CA4      | missense  | NM_000717.3:c.158C>T    | p.Pro53Leu   | <b>-3</b> | <b>C65</b> | <b>Deleterious</b> | <b>bad</b> | Het  | Alpha carbonic anhydrase                   |  |
|    | 17 | 63221207  | RGS9     | missense  | NM_003835.3:c.1495T>C   | p.Ser499Pro  | <b>-1</b> | C0         | <b>Deleterious</b> | unknown    | Het  |                                            |  |
| A  | X  | 32459413  | DMD      | missense  | NM_004006.2:c.3805C>A   | p.His1269Asn | 1         | C0         | Tolerated          | good       | Het  | Spectrin/alpha-actinin                     |  |
| A  | X  | 38163895  | RPGR     | missense  | NM_001034853.1:c.927G>T | p.Leu309Phe  | 0         | C0         | <b>Deleterious</b> | good       | Het  | Regulator of chromosome condensation, RCC1 |  |

Candidate variants after alignment, variant calling and filtering are shown. The chromosome and position of the variants are depicted according to the human genome assembly, hg19. For the missense variants, pathogenic scores are shown in bold and italicised text. So for BLOSUM62, high pathogenicity=<0; AGVGD, high pathogenicity=C15 to C65; SIFT prediction, high pathogenicity=deleterious; MAPP prediction, high pathogenicity=bad. Homo = homozygous. Het = heterozygous. Whether the missense variant lies within a protein domain is also shown. NA = not annotated. Segregation of the variants where DNA from additional family members was available is also highlighted. A = artefact, R = real. The variants confirmed to be pathogenic are highlighted in bold and underlined.
